# Supplementary material for: Decoding the Identity of Pinot Gris and Pinot Noir Wines: A Comprehensive Chemometric Fusion of Sensory (from Dual Panel) and Chemical Analysis
Source: MDPI journal article supplement (doi:10.3390/foods13010018), 2023-12-20
Supplement: s1 [file s1]

**Decoding the identity of Pinot Gris and Pinot Noir wines: A comprehensive chemometric fusion of sensory (from dual panel) and chemical analysis**

Aakriti Darnal,<sup>1,2</sup> Simone Poggesi,<sup>1,2,3</sup> Edoardo Longo,<sup>1,2\*</sup> Annagrazia Arbore,<sup>1,2</sup> and Emanuele Boselli<sup>1,2</sup>

**AFFILIATIONS**

<sup>1</sup>Oenolab, NOI Techpark Alto Adige/Südtirol, Via A. Volta 13B, 39100 Bolzano, Italy

<sup>2</sup> Free University of Bozen-Bolzano, Faculty of Agricultural, Environmental, and Food Sciences, Piazza Università 1, 39100 Bolzano, Italy

<sup>3</sup> Food Experience and Sensory Testing (Feast) Lab, Massey University, Palmerston North 4410, New Zealand

\*corresponding author: edoardo.longo@unibz.it

## **Supplementary File**

**Table S1: Results for 1<sup>st</sup> Training Session (Aroma) for Pinot Gris**

| ATTRIBUTES        | % CORRECT ANSWERS BLIND TEST | % CORRECT ANSWERS DESCRIPTOR TEST |
|-------------------|------------------------------|-----------------------------------|
| GREEN TEA         | 20%                          | 44%                               |
| ROSE              | 30%                          | 56%                               |
| APPLE/PEAR MIX    | 100%                         | 100%                              |
| GREEN BELL PEPPER | 80%                          | 100%                              |
| HONEY             | 50%                          | 100%                              |
| OAK WOOD          | 70%                          | 78%                               |
| CLOVE             | 70%                          | 100%                              |
| WHITE PEPPER      | 70%                          | 100%                              |
| ALCOHOL           | 65%                          | 100%                              |
| PINEAPPLE         | 90%                          | 100%                              |
| BANANA            | 35%                          | 56%                               |
| <b>TOTAL</b>      | <b>68%</b>                   | <b>73%</b>                        |

**Table S2: Results for 2<sup>nd</sup> Training Session (Aroma) for Pinot Gris**

| ATTRIBUTES   | % CORRECT ANSWERS DESCRIPTOR TEST |
|--------------|-----------------------------------|
| GREEN TEA    | 50%                               |
| ROSE         | 40%                               |
| HONEY        | 90%                               |
| <b>TOTAL</b> | <b>60%</b>                        |

**Table S3: Results for 2<sup>nd</sup> Training Session (Taste) for Pinot Gris**

| ATTRIBUTES   | % CORRECT ANSWERS TASTE TEST |
|--------------|------------------------------|
| WARMNESS     | 50%                          |
| BITTERNESS   | 60%                          |
| SOURNESS     | 90%                          |
| SALTINESS    | 100%                         |
| <b>TOTAL</b> | <b>60%</b>                   |

**Table S4: Results for 2<sup>nd</sup> Training Session (Flavour) for Pinot Gris**

| ATTRIBUTES    | % CORRECT ANSWERS |
|---------------|-------------------|
| APPLE/PEAR    | 60%               |
| PEACH/APRICOT | 45%               |
| <b>TOTAL</b>  | <b>53%</b>        |

**Table S5: Results for 1<sup>st</sup> Training Session (Aroma) for Pinot Noir**

| ATTRIBUTES        | % CORRECT ANSWERS BLIND<br>TEST | % CORRECT ANSWERS DESCRIPTOR<br>TEST |
|-------------------|---------------------------------|--------------------------------------|
| FRESH WOOD        | 55%                             | 60%                                  |
| COFFEE            | 100%                            | 100%                                 |
| CLOVES            | 50%                             | 50%                                  |
| BLACK PEPPER      | 70%                             | 80%                                  |
| LICORICE          | 90%                             | 80%                                  |
| CHERRY            | 40%                             | 90%                                  |
| STRAWBERRY        | 50%                             | 40%                                  |
| STRAWBERRY JAM    | 25%                             | 90%                                  |
| ROSE              | 30%                             | 50%                                  |
| GREEN BELL PEPPER | 80%                             | 100%                                 |
| <b>TOTAL</b>      | <b>59%</b>                      | <b>74%</b>                           |

**Table S6: Results for 2<sup>nd</sup> Training Session (Aroma) for Pinot Noir**

| ATTRIBUTES     | % CORRECT ANSWERS DESCRIPTOR TEST |
|----------------|-----------------------------------|
| ROSE           | 78%                               |
| STRAWBERRY     | 22%                               |
| CHERRY         | 56%                               |
| CLOVES         | 100%                              |
| STRAWBERRY JAM | 22%                               |
| FRESH WOOD     | 56%                               |
| <b>TOTAL</b>   | <b>56%</b>                        |

**Table S7: Results for 2<sup>nd</sup> Training Session (Taste) for Pinot Noir**

| ATTRIBUTES        | % CORRECT ANSWERS TASTE TEST |
|-------------------|------------------------------|
| ASTRINGENCY       | 50%                          |
| BITTERNESS        | 60%                          |
| SOURNESS-TARTARIC | 90%                          |
| SOURNESS-LACTIC   | 100%                         |
| <b>TOTAL</b>      | <b>81%</b>                   |

**Table S8: Results for 3<sup>rd</sup> Training Session (Aroma )for Pinot Noir**

| ATTRIBUTES     | % CORRECT ANSWERS DESCRIPTOR TEST |
|----------------|-----------------------------------|
| STRAWBERRY     | 67%                               |
| STRAWBERRY JAM | 67%                               |
| TOTAL          | 67%                               |

**Table S9: Results for 3<sup>rd</sup> Training Session (Taste )for Pinot Noir**

| ATTRIBUTES               | % CORRECT ANSWERS TASTE TEST |
|--------------------------|------------------------------|
| SWEETNESS (GLU-FRU-SUCR) | 56%                          |
| WARMNESS                 | 67%                          |
| ASTRINGENCY              | 89%                          |
| TOTAL                    | 70%                          |

**Table S10: Results for 3<sup>rd</sup> Training Session (Flavour)for Pinot Noir**

| ATTRIBUTES | % CORRECT ANSWERS DESCRIPTOR TEST |
|------------|-----------------------------------|
| WOODY      | 89%                               |
| RED FRUIT  | 100%                              |
| VEGETATIVE | 100%                              |
| SPICY      | 67%                               |
| TOTAL      | 89%                               |

**Table S11: List of identified volatile compounds in Pinot Gris**

| S.N.  | Compounds                           | Retention Times |             | Calculated Retention Index | Base mass ( <i>m/z</i> ) |
|-------|-------------------------------------|-----------------|-------------|----------------------------|--------------------------|
|       |                                     | RT I (min)      | RT II (sec) |                            |                          |
| I     | Ethyl acetate                       | 5.2             | 0.7         | 949                        | 43                       |
| II    | Ethyl butanoate                     | 8.7             | 1.4         | 1032                       | 71                       |
| III   | Isobutyl alcohol                    | 11.7            | 0.6         | 1102                       | 43                       |
| IV    | Isoamyl acetate                     | 12.5            | 1.6         | 1120                       | 43                       |
| V     | Ethyl hexanoate                     | 17.5            | 1.7         | 1239                       | 88                       |
| VI    | Isopentanol                         | 17.6            | 0.7         | 1241                       | 55                       |
| VII   | Hexyl acetate                       | 19.0            | 1.7         | 1273                       | 43                       |
| VIII  | 3-Ethyl-3-hexanol                   | 19.3            | 0.9         | 1279                       | 55                       |
| IX    | Ethyl octanoate                     | 26.3            | 1.7         | 1436                       | 88                       |
| X     | Acetic acid                         | 27.2            | 0.9         | 1456                       | 43                       |
| XI    | Ethyl sorbate (isomer I)            | 28.1            | 1.3         | 1480                       | 67                       |
| XII   | Ethyl sorbate (isomer II)           | 29.4            | 1.3         | 1511                       | 67                       |
| XIII  | Benzaldehyde                        | 29.5            | 1.0         | 1514                       | 77                       |
| XIV   | Nonanoic acid, 2-oxo-, methyl ester | 29.8            | 1.2         | 1521                       | 57                       |
| XV    | Octanoic acid, phenyl ester         | 29.8            | 1.6         | 1521                       | 57                       |
| XVI   | Linalool                            | 30.9            | 1.0         | 1549                       | 41                       |
| XVII  | 2,3-Butanediol (I)                  | 32.3            | 0.6         | 1583                       | 45                       |
| XVIII | 2,3-Butanediol (II)                 | 33.1            | 0.6         | 1602                       | 45                       |
| XIX   | Ethyl 2-furoate                     | 33.7            | 0.8         | 1616                       | 95                       |
| XX    | Ethyl decanoate                     | 34.3            | 1.8         | 1633                       | 88                       |

|         |                           |      |     |      |     |
|---------|---------------------------|------|-----|------|-----|
| XXI     | Isopentyl octanoate       | 35.0 | 2.1 | 1648 | 70  |
| XXII    | Ethyl succinate           | 36.0 | 0.9 | 1668 | 101 |
| XXIII   | a-Terpineol               | 36.7 | 0.7 | 1683 | 59  |
| XXIV    | Vinyl decanoate           | 37.6 | 1.3 | 1702 | 43  |
| XXV     | ethyl phenylacetate       | 39.7 | 1.1 | 1746 | 91  |
| XXVI    | 2-Phenethyl acetate       | 40.8 | 0.9 | 1769 | 104 |
| XXVII   | Benzenebutanal            | 40.8 | 2.0 | 1769 | 104 |
| XXVIII  | Ethyl dodecanoate         | 41.7 | 2.4 | 1789 | 88  |
| XXIX    | Hexanoic acid             | 42.1 | 0.9 | 1797 | 60  |
| XXX     | Isoamyl decanoate         | 42.3 | 1.9 | 1803 | 70  |
| XXXI    | Ethyl isopentyl succinate | 44.0 | 1.1 | 1837 | 101 |
| XXXII   | Phenylethyl Alcohol       | 44.3 | 0.6 | 1850 | 91  |
| XXXIII  | Octanoic acid             | 49.2 | 0.5 | 2083 | 60  |
| XXXIV   | Sorbic Acid               | 51.9 | 0.9 | 2213 | 97  |
| XXXV    | Ethyl hexadecanoate       | 54.5 | 1.3 | 2336 | 88  |
| XXXVII  | Decanoic acid             | 55.0 | 0.5 | 2361 | 60  |
| XXXVIII | 2,4-Di-tert-butylphenol   | 55.6 | 0.6 | 2387 | 191 |

**Table S12: List of identified volatile compounds in Pinot Noir**

| S.N. | Compounds                                                     | Retention Times |             | Calculated Retention Index | Base mass ( <i>m/z</i> ) |
|------|---------------------------------------------------------------|-----------------|-------------|----------------------------|--------------------------|
|      |                                                               | RT I (min)      | RT II (sec) |                            |                          |
| I    | Ethyl Acetate                                                 | 4.7             | 0.8         | 937                        | 43                       |
| II   | Isoamyl acetate                                               | 12.1            | 1.7         | 1109                       | 70                       |
| III  | Isopentanol                                                   | 16.6            | 0.6         | 1217                       | 55                       |
| IV   | Ethyl hexanoate                                               | 17.4            | 1.8         | 1232                       | 88                       |
| V    | Hexyl acetate                                                 | 18.9            | 1.3         | 1217                       | 56                       |
| VI   | Furfuryl ethyl ether                                          | 19.6            | 1.1         | 1287                       | 81                       |
| VII  | Ethyl lactate                                                 | 22.4            | 0.6         | 1349                       | 75                       |
| VIII | 1-Hexanol                                                     | 22.9            | 0.6         | 1361                       | 56                       |
| IX   | Ethyl octanoate                                               | 26.2            | 1.8         | 1429                       | 88                       |
| X    | Furfural                                                      | 27.2            | 0.8         | 1460                       | 96                       |
| XI   | Acetic acid                                                   | 27.3            | 0.5         | 1455                       | 43                       |
| XIII | 2-Ethyl-1-hexanol                                             | 28.7            | 0.8         | 1493                       | 57                       |
| XIV  | Ethyl sorbate                                                 | 29.1            | 1.0         | 1503                       | 67                       |
| XV   | 2(1H)-Naphthalenone, 3,4,4a,5,6,7-hexahydro-1,1,4a-trimethyl- | 29.5            | 2.2         | 1516                       | 93                       |
| XVI  | Benzaldehyde                                                  | 29.6            | 0.9         | 1515                       | 77                       |
| XVII | β-ionone                                                      | 29.7            | 1.8         | 1522                       | 41                       |
| XX   | Linalyl acetate                                               | 30.9            | 0.7         | 1549                       | 41                       |
| XXI  | Isoamyl lactate                                               | 31.8            | 0.7         | 1570                       | 45                       |
| XXII | 2,3-Butanediol                                                | 32.4            | 0.6         | 1598                       | 45                       |

|         |                                                  |      |     |      |     |
|---------|--------------------------------------------------|------|-----|------|-----|
| XXIV    | Ethyl 2-furoate                                  | 33.6 | 0.7 | 1615 | 95  |
| XXV     | Ethyl decanoate                                  | 34.3 | 1.6 | 1630 | 88  |
| XXVII   | Ethyl succinate                                  | 36.0 | 1.0 | 1666 | 101 |
| XXVIII  | Ethyl 9-decenoate                                | 36.2 | 1.4 | 1673 | 88  |
| XXIX    | $\alpha$ -Terpineol                              | 36.7 | 0.9 | 1683 | 59  |
| XXX     | 4-tert-Butylcyclohexanol                         | 36.8 | 0.9 | 1688 | 57  |
| XXXII   | Z-9-Tetradecenyl acetate                         | 39.3 | 1.2 |      | 55  |
| XXXIII  | ethyl phenylacetate                              | 39.6 | 1.2 | 1745 | 43  |
| XXXIV   | trans-Cubebol                                    | 40.2 | 1.6 |      | 161 |
| XXXV    | 2-Phenethyl acetate                              | 40.7 | 1.2 | 1768 | 104 |
| XXXVI   | 4-Methyl-6-phenyltetrahydro-1,3-oxazine-2-thione | 40.7 | 1.9 |      | 104 |
| XXXVII  | Benzenebutanal                                   | 39.7 | 0.8 | 1746 | 104 |
| XXXVIII | $\beta$ -damascenone                             | 40.9 | 1.2 | 1771 | 69  |
| XXXIX   | Cyclobuta[a]dibenzo[c,f]cycloheptadiene, 7-oxo-  | 40.7 | 2.2 |      | 104 |
| XL      | Hexanoic acid                                    | 42.0 | 0.8 | 1797 | 60  |
| XLI     | Benzyl alcohol                                   | 43.0 | 0.7 | 1817 | 79  |
| XLII    | (trans-whiskey lactone)                          | 43.4 | 0.9 | 1824 | 99  |
| XLIII   | Ethyl isopentyl succinate                        | 43.9 | 1.2 | 1836 | 101 |
| XLIV    | Phenol, 4-ethyl-2-methoxy-                       | 47.9 | 1.0 | 2029 | 137 |
| XLV     | Nerolidol                                        | 48.4 | 1.0 | 2043 | 60  |
| XLVI    | Octanoic acid                                    | 49.1 | 1.2 | 2081 | 60  |
| XLVII   | Phenol, 4-ethyl-                                 | 52.5 | 0.5 | 2241 | 107 |

|               |                                |      |     |      |     |
|---------------|--------------------------------|------|-----|------|-----|
| <b>XLVIII</b> | Hexadecanoic acid, ethyl ester | 54.5 | 1.4 | 2335 | 88  |
| <b>XLIX</b>   | n-Decanoic acid                | 55.0 | 0.6 | 2361 | 60  |
| <b>L</b>      | 2,4-Di-tert-butylphenol        | 55.5 | 0.6 | 2385 | 191 |

**Table S13: List of tentatively identified phenolic compounds in Pinot Gris (PG) and Pinot Noir (PN) wines based on retention time. The compounds followed by asterisk were assigned by observing the mass fragmentation, whereas all the other compounds were identified by injecting the related standard compounds. The data of the fragmentation is reported in Table S20 and S21 in the Excel Supporting Information File S2.**

| Code PG | Code PN    | Compound assignment                                   | R.T. (min) | ESI-mass (m/z) | MS <sup>2</sup> fragments (m/z ) |
|---------|------------|-------------------------------------------------------|------------|----------------|----------------------------------|
| x23     |            | Gallic acid                                           | 2.9        | 169            |                                  |
| x29     |            | Sulfonated caftaric acid (tentative)*                 | 4.3        | 391            | 259,241,213, 161, 149            |
| x55     | x84        | Glycosylated derivative of dihydroxybenzoic acid*     | 6.6        | 315            | 153,123                          |
| x57     |            | Kaempferol glucuronide (tentative)*                   | 6.7        | 157            |                                  |
|         | x57        | $\beta$ – glucopyranoside*                            | 4.3        | 345            | 161,139,97                       |
| x61     | x88 (6.9)  | Caftaric acid                                         | 6.9        | 311            | 149,135                          |
| x75     | x92 (7.1)  | Glutathionyl caftaric acid, trans isomer (tentative)* | 7.2        | 616            |                                  |
| x81     |            | Cis-coutaric acid*                                    | 8.1        | 295            |                                  |
|         | x101       | Caffeic acid hexoside*                                | 8.9        | 341            | 179, 161, 135, 71                |
| x88     | x104 (9.0) | Catechin                                              | 9.0        | 289            |                                  |
| x90     |            | Fertaric acid, cis isomer*                            | 9.2        | 325            |                                  |
| x94     | x113 (9.6) | Caffeic acid                                          | 9.6        | 179            |                                  |
| x105    |            | Astilbin                                              | 14.2       | 449            | 285, 151                         |
|         | x114       | Caffeic acid dimer*                                   | 9.6        | 357            | 135,86                           |

**Table S14: Single Ion Monitoring (SIM) acquisition parameters for analysis of PAC in Pinot Gris and Pinot Noir wines, Total Scan Cycle time = 500 ms**

| Compound             | Mass (m/z) | MS2 Res  | Dwell Time (ms) | Fragmentor | Cell Accelerator Voltage | Polarity |
|----------------------|------------|----------|-----------------|------------|--------------------------|----------|
| hexamers (PC)        | 1731.5     | Unit (*) | 16              | 135        | 5                        | Positive |
| c-hexamer (PC)       | 1729.5     | Unit     | 16              | 135        | 5                        | Positive |
| 5OH-pentamers (PD)   | 1523.4     | Unit     | 16              | 135        | 5                        | Positive |
| c-5OH-pentamers (PD) | 1521.4     | Unit     | 16              | 135        | 5                        | Positive |
| 4OH-pentamers (PD)   | 1507.4     | Unit     | 16              | 135        | 5                        | Positive |
| c-4OH-pentamers (PD) | 1505.4     | Unit     | 16              | 135        | 5                        | Positive |
| 3OH-pentamers (PD)   | 1491.4     | Unit     | 16              | 135        | 5                        | Positive |
| c-3OH-pentamers (PD) | 1489.4     | Unit     | 16              | 135        | 5                        | Positive |
| 2OH-pentamers (PD)   | 1475.4     | Unit     | 16              | 135        | 5                        | Positive |
| c-2OH-pentamers (PD) | 1473.4     | Unit     | 16              | 135        | 5                        | Positive |
| OH-pentamers (PD)    | 1459.4     | Unit     | 16              | 135        | 5                        | Positive |
| c-OH-pentamers (PD)  | 1457.4     | Unit     | 20              | 135        | 5                        | Positive |
| pentamers (PC)       | 1443.4     | Unit     | 16              | 135        | 5                        | Positive |
| c-pentamer (PC)      | 1441.4     | Unit     | 50              | 135        | 5                        | Positive |
| 4OH-tetramers (PD)   | 1219.3     | Unit     | 16              | 135        | 5                        | Positive |
| c-4OH-tetramers (PD) | 1217.3     | Unit     | 16              | 135        | 5                        | Positive |
| 3OH-tetramers (PD)   | 1203.3     | Unit     | 50              | 135        | 5                        | Positive |
| c-3OH-tetramers (PD) | 1201.3     | Unit     | 16              | 135        | 5                        | Positive |
| 2OH-tetramers (PD)   | 1187.3     | Unit     | 50              | 135        | 5                        | Positive |
| c2OH-tetramers (PD)  | 1185.3     | Unit     | 50              | 135        | 5                        | Positive |
| OH-tetramers (PD)    | 1171.3     | Unit     | 50              | 135        | 5                        | Positive |
| c-OH-tetramer (PD)   | 1169.3     | Unit     | 50              | 135        | 5                        | Positive |
| tetramers (PC)       | 1155.3     | Unit     | 50              | 135        | 5                        | Positive |
| c-tetramer (PC)      | 1153.3     | Unit     | 50              | 135        | 5                        | Positive |
| Trimers OH (PD)      | 883.2      | Unit     | 16              | 135        | 5                        | Positive |
| Trimers (PC)         | 867.2      | Unit     | 16              | 135        | 5                        | Positive |
| Dimers OH2 (PD)      | 611.1      | Unit     | 16              | 135        | 5                        | Positive |

|                     |       |                                  |    |     |   |          |
|---------------------|-------|----------------------------------|----|-----|---|----------|
| Dimers OH (PD)      | 595.1 | Unit                             | 16 | 135 | 5 | Positive |
| Dimers (PC)         | 579.1 | Unit                             | 16 | 135 | 5 | Positive |
| PC = procyanidin    |       | Unit(*) resolution = +/- 0.7 amu |    |     |   |          |
| PD = prodelphinidin |       |                                  |    |     |   |          |

**Table S15: Filtered PAC features observed in the LC-MS analysis for Pinot Gris**

| <i>m/z</i> | Retention Time | Compounds            |
|------------|----------------|----------------------|
| 579        | 18.2           | Dimer (PC)           |
| 579        | 23.9           | Dimer (PC)           |
| 595        | 24.4           | Dimer OH (PD)        |
| 611        | 6.1            | Dimers OH2 (PD)      |
| 611        | 6.4            | Dimers OH2 (PD)      |
| 611        | 10.2           | Dimers OH2 (PD)      |
| 611        | 11.8           | Dimers OH2 (PD)      |
| 611        | 12             | Dimers OH2 (PD)      |
| 611        | 14.2           | Dimers OH2 (PD)      |
| 611        | 17.2           | Dimers OH2 (PD)      |
| 611        | 18             | Dimers OH2 (PD)      |
| 611        | 19             | Dimers OH2 (PD)      |
| 611        | 20.1           | Dimers OH2 (PD)      |
| 611        | 20.9           | Dimers OH2 (PD)      |
| 611        | 21.8           | Dimers OH2 (PD)      |
| 867        | 12.5           | Trimer (PC)          |
| 867        | 15.8           | Trimer (PC)          |
| 867        | 16.9           | Trimer (PC)          |
| 867        | 18.7           | Trimer (PC)          |
| 867        | 21.3           | Trimer (PC)          |
| 883        | 7.3            | Trimer OH (PD)       |
| 883        | 9.9            | Trimer OH (PD)       |
| 883        | 11.5           | Trimer OH (PD)       |
| 883        | 13.8           | Trimer OH (PD)       |
| 883        | 16.7           | Trimer OH (PD)       |
| 883        | 18             | Trimer OH (PD)       |
| 1153       | 22.1           | c-Tetramer (c-PC)    |
| 1153       | 22.7           | c-Tetramer (c-PC)    |
| 1155       | 10.2           | Tetramer (PC)        |
| 1155       | 17.2           | Tetramer (PC)        |
| 1155       | 19.6           | Tetramer (PC)        |
| 1169       | 17.1           | c-OH-Tetramer (c-PD) |
| 1171       | 10.1           | OH-Tetramer (PD)     |
| 1171       | 10.7           | OH-Tetramer (PD)     |

|      |      |                  |
|------|------|------------------|
| 1171 | 11.5 | OH-Tetramer (PD) |
| 1171 | 14.5 | OH-Tetramer (PD) |
| 1171 | 15.2 | OH-Tetramer (PD) |
| 1171 | 15.9 | OH-Tetramer (PD) |
| 1171 | 17.1 | OH-Tetramer (PD) |
| 1171 | 18.6 | OH-Tetramer (PD) |
| 1171 | 18.7 | OH-Tetramer (PD) |
| 1171 | 23.8 | OH-Tetramer (PD) |
| 1171 | 24.7 | OH-Tetramer (PD) |
| 1441 | 24.7 | c-Pentamer (PC)  |
| 1443 | 7.8  | Pentamer (PC)    |
| 1443 | 11.2 | Pentamer (PC)    |
| 1443 | 12.1 | Pentamer (PC)    |
| 1443 | 13   | Pentamer (PC)    |
| 1443 | 13.5 | Pentamer (PC)    |
| 1443 | 14.6 | Pentamer (PC)    |
| 1443 | 19   | Pentamer (PC)    |
| 1443 | 22.2 | Pentamer (PC)    |

**Table S16: Filtered PAC features observed in the LC-MS analysis for Pinot Noir**

| <i>m/z</i> | Retention Time | Compounds  |
|------------|----------------|------------|
| 579        | 15.6           | Dimer (PC) |
| 579        | 35.4           | Dimer (PC) |
| 579        | 37.5           | Dimer (PC) |
| 579        | 39.7           | Dimer (PC) |
| 579        | 41.3           | Dimer (PC) |
| 579        | 47.6           | Dimer (PC) |
| 579        | 49.0           | Dimer (PC) |
| 579        | 17.3           | Dimer (PC) |
| 579        | 20.9           | Dimer (PC) |
| 579        | 22.3           | Dimer (PC) |
| 579        | 27.2           | Dimer (PC) |
| 579        | 29.2           | Dimer (PC) |
| 579        | 30.9           | Dimer (PC) |
| 579        | 33.8           | Dimer (PC) |
| 579        | 34.5           | Dimer (PC) |

|     |      |                 |
|-----|------|-----------------|
| 595 | 15.4 | Dimer OH (PD)   |
| 595 | 28.1 | Dimer OH (PD)   |
| 595 | 29.5 | Dimer OH (PD)   |
| 595 | 29.9 | Dimer OH (PD)   |
| 595 | 30.3 | Dimer OH (PD)   |
| 595 | 32.9 | Dimer OH (PD)   |
| 595 | 33.6 | Dimer OH (PD)   |
| 595 | 34.3 | Dimer OH (PD)   |
| 595 | 35.2 | Dimer OH (PD)   |
| 595 | 38.8 | Dimer OH (PD)   |
| 595 | 40.6 | Dimer OH (PD)   |
| 595 | 16.2 | Dimer OH (PD)   |
| 595 | 41.2 | Dimer OH (PD)   |
| 595 | 47.3 | Dimer OH (PD)   |
| 595 | 49.4 | Dimer OH (PD)   |
| 595 | 17.0 | Dimer OH (PD)   |
| 595 | 20.2 | Dimer OH (PD)   |
| 595 | 21.9 | Dimer OH (PD)   |
| 595 | 24.1 | Dimer OH (PD)   |
| 595 | 24.9 | Dimer OH (PD)   |
| 595 | 26.4 | Dimer OH (PD)   |
| 595 | 27.2 | Dimer OH (PD)   |
| 611 | 10.4 | Dimers OH2 (PD) |
| 611 | 24.6 | Dimers OH2 (PD) |
| 611 | 35.4 | Dimers OH2 (PD) |
| 611 | 27.2 | Dimers OH2 (PD) |
| 611 | 28.2 | Dimers OH2 (PD) |
| 611 | 29.1 | Dimers OH2 (PD) |
| 611 | 30.2 | Dimers OH2 (PD) |
| 611 | 31.3 | Dimers OH2 (PD) |
| 611 | 38.6 | Dimers OH2 (PD) |
| 611 | 40.9 | Dimers OH2 (PD) |
| 611 | 41.1 | Dimers OH2 (PD) |
| 611 | 11.4 | Dimers OH2 (PD) |
| 611 | 42.4 | Dimers OH2 (PD) |
| 611 | 14.2 | Dimers OH2 (PD) |
| 611 | 15.4 | Dimers OH2 (PD) |

|     |      |                 |
|-----|------|-----------------|
| 611 | 16.9 | Dimers OH2 (PD) |
| 611 | 19.9 | Dimers OH2 (PD) |
| 611 | 20.9 | Dimers OH2 (PD) |
| 611 | 21.5 | Dimers OH2 (PD) |
| 611 | 22.0 | Dimers OH2 (PD) |
| 867 | 13.7 | Trimer (PC)     |
| 867 | 37.4 | Trimer (PC)     |
| 867 | 38.4 | Trimer (PC)     |
| 867 | 39.0 | Trimer (PC)     |
| 867 | 39.6 | Trimer (PC)     |
| 867 | 41.7 | Trimer (PC)     |
| 867 | 41.7 | Trimer (PC)     |
| 867 | 41.8 | Trimer (PC)     |
| 867 | 42.7 | Trimer (PC)     |
| 867 | 43.6 | Trimer (PC)     |
| 867 | 20.8 | Trimer (PC)     |
| 867 | 29.2 | Trimer (PC)     |
| 867 | 31.6 | Trimer (PC)     |
| 867 | 32.6 | Trimer (PC)     |
| 867 | 33.4 | Trimer (PC)     |
| 867 | 35.0 | Trimer (PC)     |
| 867 | 36.1 | Trimer (PC)     |
| 867 | 37.3 | Trimer (PC)     |
| 883 | 9.3  | Trimer OH (PD)  |
| 883 | 27.3 | Trimer OH (PD)  |
| 883 | 27.3 | Trimer OH (PD)  |
| 883 | 28.0 | Trimer OH (PD)  |
| 883 | 28.4 | Trimer OH (PD)  |
| 883 | 29.4 | Trimer OH (PD)  |
| 883 | 29.9 | Trimer OH (PD)  |
| 883 | 30.3 | Trimer OH (PD)  |
| 883 | 30.7 | Trimer OH (PD)  |
| 883 | 31.2 | Trimer OH (PD)  |
| 883 | 33.0 | Trimer OH (PD)  |
| 883 | 10.7 | Trimer OH (PD)  |
| 883 | 33.9 | Trimer OH (PD)  |
| 883 | 34.9 | Trimer OH (PD)  |

|      |      |                   |
|------|------|-------------------|
| 883  | 37.0 | Trimer OH (PD)    |
| 883  | 38.1 | Trimer OH (PD)    |
| 883  | 38.6 | Trimer OH (PD)    |
| 883  | 15.4 | Trimer OH (PD)    |
| 883  | 17.5 | Trimer OH (PD)    |
| 883  | 18.5 | Trimer OH (PD)    |
| 883  | 19.2 | Trimer OH (PD)    |
| 883  | 21.9 | Trimer OH (PD)    |
| 883  | 24.7 | Trimer OH (PD)    |
| 883  | 26.0 | Trimer OH (PD)    |
| 1153 | 21.5 | c-Tetramer (c-PC) |
| 1155 | 16.2 | Tetramer (PC)     |
| 1155 | 35.7 | Tetramer (PC)     |
| 1155 | 36.2 | Tetramer (PC)     |
| 1155 | 37.4 | Tetramer (PC)     |
| 1155 | 37.5 | Tetramer (PC)     |
| 1155 | 38.9 | Tetramer (PC)     |
| 1155 | 38.9 | Tetramer (PC)     |
| 1155 | 40.9 | Tetramer (PC)     |
| 1155 | 42.4 | Tetramer (PC)     |
| 1155 | 42.4 | Tetramer (PC)     |
| 1155 | 44.6 | Tetramer (PC)     |
| 1155 | 21.4 | Tetramer (PC)     |
| 1155 | 27.6 | Tetramer (PC)     |
| 1155 | 29.6 | Tetramer (PC)     |
| 1155 | 31.0 | Tetramer (PC)     |
| 1155 | 31.8 | Tetramer (PC)     |
| 1155 | 32.9 | Tetramer (PC)     |
| 1155 | 32.9 | Tetramer (PC)     |
| 1155 | 33.4 | Tetramer (PC)     |
| 1171 | 10.6 | OH-Tetramer (PD)  |
| 1171 | 22.1 | OH-Tetramer (PD)  |
| 1171 | 23.3 | OH-Tetramer (PD)  |
| 1171 | 24.5 | OH-Tetramer (PD)  |
| 1171 | 24.5 | OH-Tetramer (PD)  |
| 1171 | 25.4 | OH-Tetramer (PD)  |
| 1171 | 25.7 | OH-Tetramer (PD)  |

|      |      |                  |
|------|------|------------------|
| 1171 | 26.4 | OH-Tetramer (PD) |
| 1171 | 27.4 | OH-Tetramer (PD) |
| 1171 | 28.0 | OH-Tetramer (PD) |
| 1171 | 29.4 | OH-Tetramer (PD) |
| 1171 | 11.4 | OH-Tetramer (PD) |
| 1171 | 29.9 | OH-Tetramer (PD) |
| 1171 | 30.4 | OH-Tetramer (PD) |
| 1171 | 30.9 | OH-Tetramer (PD) |
| 1171 | 31.6 | OH-Tetramer (PD) |
| 1171 | 32.6 | OH-Tetramer (PD) |
| 1171 | 32.6 | OH-Tetramer (PD) |
| 1171 | 33.4 | OH-Tetramer (PD) |
| 1171 | 34.3 | OH-Tetramer (PD) |
| 1171 | 34.8 | OH-Tetramer (PD) |
| 1171 | 34.8 | OH-Tetramer (PD) |
| 1171 | 14.2 | OH-Tetramer (PD) |
| 1171 | 35.2 | OH-Tetramer (PD) |
| 1171 | 35.2 | OH-Tetramer (PD) |
| 1171 | 36.5 | OH-Tetramer (PD) |
| 1171 | 38.5 | OH-Tetramer (PD) |
| 1171 | 39.0 | OH-Tetramer (PD) |
| 1171 | 15.4 | OH-Tetramer (PD) |
| 1171 | 16.2 | OH-Tetramer (PD) |
| 1171 | 17.1 | OH-Tetramer (PD) |
| 1171 | 19.0 | OH-Tetramer (PD) |
| 1171 | 20.9 | OH-Tetramer (PD) |
| 1171 | 21.9 | OH-Tetramer (PD) |
| 1441 | 23.6 | c-Pentamer (PC)  |
| 1443 | 23.6 | Pentamer (PC)    |
| 1443 | 31.8 | Pentamer (PC)    |
| 1443 | 32.6 | Pentamer (PC)    |
| 1443 | 34.0 | Pentamer (PC)    |
| 1443 | 35.4 | Pentamer (PC)    |
| 1443 | 37.6 | Pentamer (PC)    |
| 1443 | 41.3 | Pentamer (PC)    |
| 1443 | 42.4 | Pentamer (PC)    |

**Table S17: Target identification of anthocyanins in Pinot Noir based on molecular ion [M-H] – (m/z) and lambda max (UV spectrum absorbance)**

| <b>Anthocyanins</b>                                | <b>Retention time (+/- 0.1 min)</b> | <b>Molecular ion [M]<sup>+</sup> (m/z)</b> | <b>λ<sub>max</sub> (+/- 4nm)</b> | <b>Fragment Ion (in source)<br/>(m/z)</b> |
|----------------------------------------------------|-------------------------------------|--------------------------------------------|----------------------------------|-------------------------------------------|
| Delfinidin-3O-glucoside<br>(Dl-3O-gl)              | 6.1                                 | 465                                        | 524                              | 303                                       |
| Petunidin-3-O-glucoside<br>(Pt-3O-gl)              | 8.4                                 | 479                                        | 515                              | 317                                       |
| Peonidin-3-O-glucoside<br>(Pn-3O-gl)               | 9.8                                 | 463                                        | 516                              | 301                                       |
| Malvidin-3-O-glucoside<br>(Mv-3O-gl)               | 10.5                                | 493                                        | 520                              | 331                                       |
| Malvidin-3-O-glucoside<br>acetylated (Mv-3O-gluAc) | 14.8                                | 535                                        | 530                              | 331                                       |

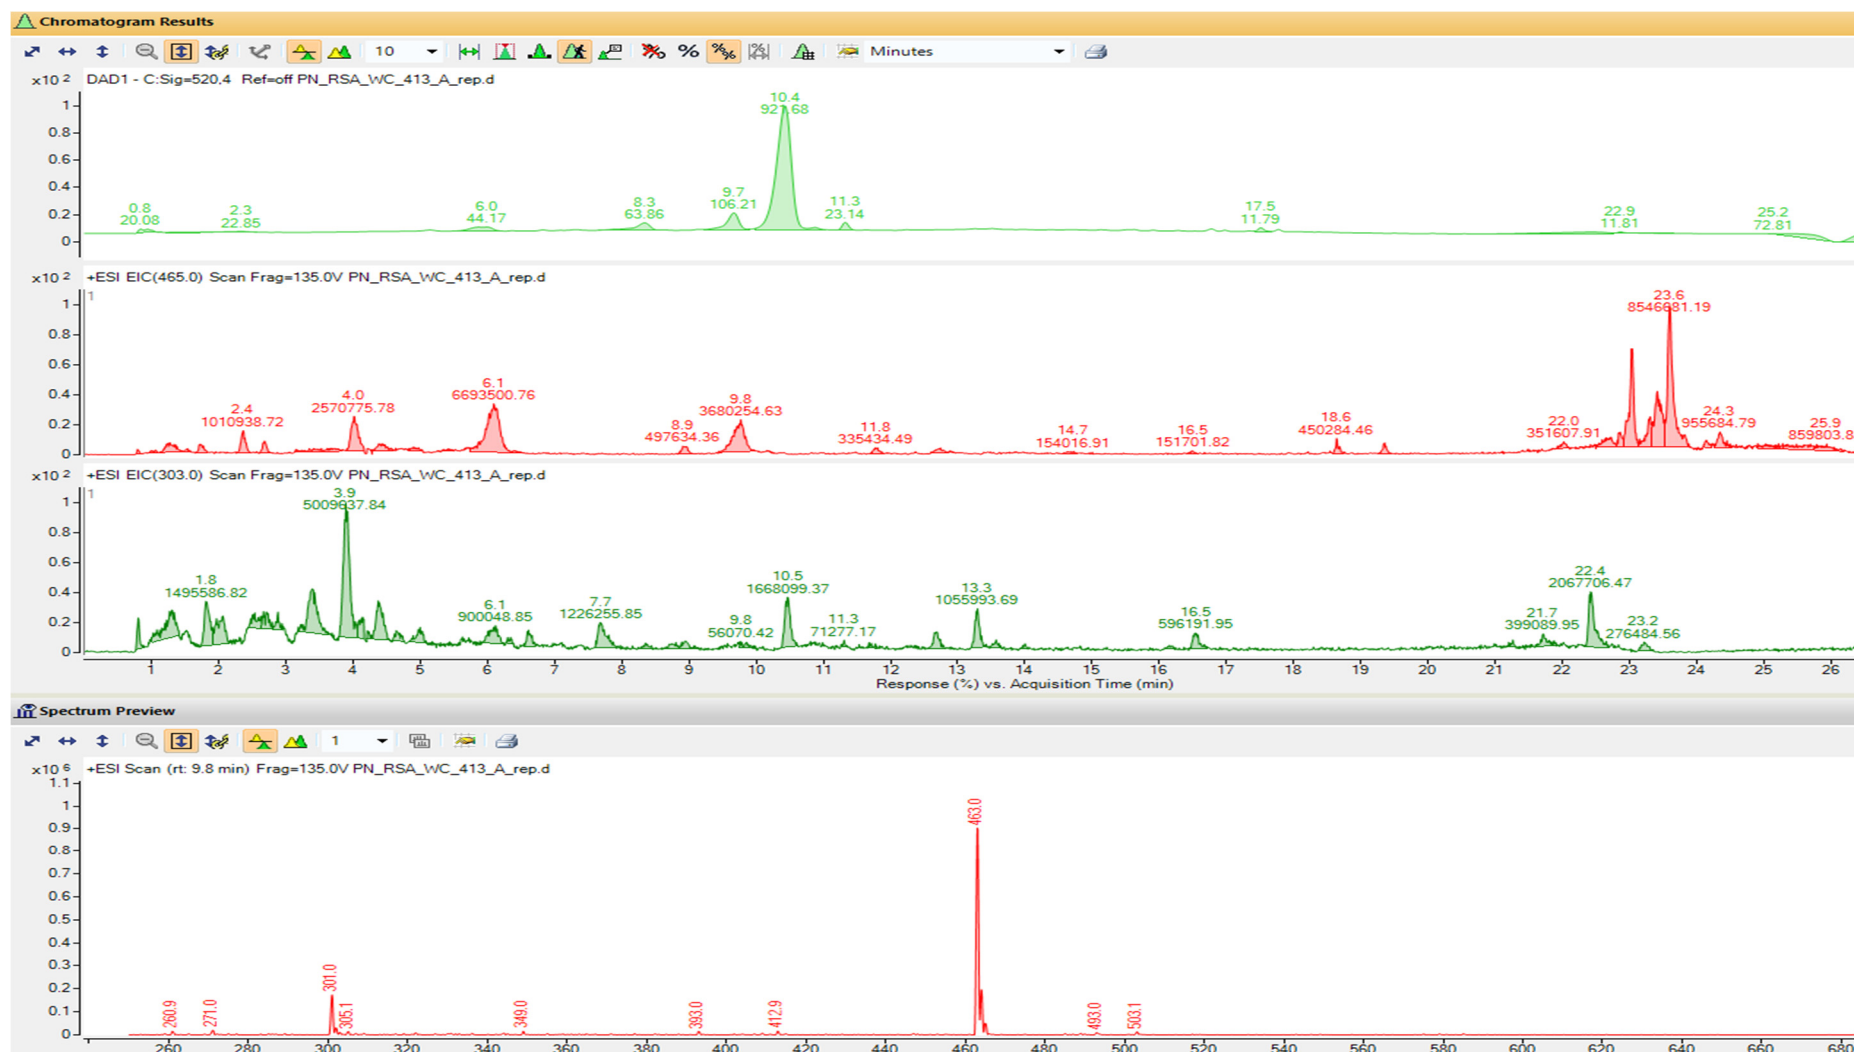

**Figure S1:** Example of a targeted analysis for peonidin-3-glucoside. DAD absorbance spectrum; EIC (Extracted Ion Chromatogram) targeting 463 m/z (precursor ion) and 303 m/z (product ion) at different retention times and MS2 fragments from ESI, reported as m/z ratio values respectively.

**Table S18 : The variables importance in projection (VIP) in the PLS regression olfactory attribute “floral” aroma vs volatile compounds for Pinot Gris**

| Variable | VIP(1) | Standard deviation | Lower bound(95%) | Upper bound(95%) |
|----------|--------|--------------------|------------------|------------------|
| VI       | 2.230  | 0.708              | 0.498            | 3.961            |
| XXII     | 2.035  | 0.591              | 0.589            | 3.481            |
| XXXI     | 1.874  | 0.587              | 0.438            | 3.310            |
| XXXII    | 1.872  | 0.671              | 0.231            | 3.514            |
| III      | 1.718  | 0.673              | 0.070            | 3.365            |
| XIX      | 1.448  | 0.533              | 0.143            | 2.752            |
| XXV      | 1.288  | 0.880              | -0.864           | 3.441            |
| XXXVII   | 1.284  | 0.701              | -0.432           | 2.999            |
| XX       | 1.181  | 0.486              | -0.008           | 2.370            |
| XXXV     | 1.086  | 0.728              | -0.694           | 2.867            |
| XXX      | 1.060  | 0.363              | 0.173            | 1.947            |
| XVII     | 1.020  | 0.804              | -0.948           | 2.987            |
| XVIII    | 0.933  | 0.869              | -1.194           | 3.060            |
| XIII     | 0.916  | 0.933              | -1.366           | 3.198            |
| XII      | 0.885  | 0.918              | -1.362           | 3.133            |
| II       | 0.855  | 0.684              | -0.819           | 2.528            |
| XI       | 0.803  | 0.923              | -1.456           | 3.062            |
| XXI      | 0.682  | 0.515              | -0.577           | 1.942            |
| XXVI     | 0.675  | 0.564              | -0.705           | 2.056            |
| IV       | 0.639  | 0.460              | -0.487           | 1.766            |

|         |       |       |        |       |
|---------|-------|-------|--------|-------|
| XXXIII  | 0.615 | 0.647 | -0.968 | 2.198 |
| XXXIV   | 0.597 | 0.613 | -0.903 | 2.096 |
| XV      | 0.567 | 0.785 | -1.354 | 2.487 |
| I       | 0.547 | 0.359 | -0.330 | 1.425 |
| X       | 0.485 | 0.290 | -0.224 | 1.195 |
| IX      | 0.475 | 0.420 | -0.554 | 1.503 |
| XXIII   | 0.461 | 0.583 | -0.966 | 1.888 |
| VII     | 0.378 | 0.321 | -0.408 | 1.165 |
| XVI     | 0.366 | 0.277 | -0.311 | 1.043 |
| XXVII   | 0.326 | 0.517 | -0.940 | 1.592 |
| XIV     | 0.317 | 0.491 | -0.885 | 1.518 |
| XXIV    | 0.157 | 0.512 | -1.097 | 1.411 |
| XXXVIII | 0.146 | 0.480 | -1.027 | 1.320 |
| XXVIII  | 0.119 | 0.284 | -0.575 | 0.813 |
| XXIX    | 0.065 | 0.338 | -0.763 | 0.893 |
| VIII    | 0.048 | 0.230 | -0.515 | 0.611 |
| V       | 0.022 | 0.331 | -0.789 | 0.832 |

**Table S19: The variables importance in projection (VIP) in the PLS regression olfactory attribute “green bell pepper” aroma vs volatile compounds for Pinot Noir**

| Variable | VIP(2) | Standard deviation | Lower bound(95%) | Upper bound(95%) |
|----------|--------|--------------------|------------------|------------------|
| XXXIII   | 1.533  | 0.736              | -0.086           | 3.153            |
| III      | 1.486  | 0.537              | 0.304            | 2.668            |
| XXVIII   | 1.204  | 0.616              | -0.151           | 2.559            |
| XLIII    | 1.142  | 0.842              | -0.711           | 2.995            |
| XLI      | 1.060  | 0.316              | 0.365            | 1.754            |
| X        | 0.993  | 0.303              | 0.326            | 1.660            |
| VIII     | 0.991  | 0.175              | 0.607            | 1.375            |
| XLII     | 0.985  | 0.190              | 0.567            | 1.402            |
| XXI      | 0.940  | 0.329              | 0.215            | 1.665            |
| VI       | 0.918  | 0.242              | 0.385            | 1.450            |
| XVI      | 0.915  | 0.430              | -0.031           | 1.861            |
| XXXVIII  | 0.895  | 0.203              | 0.449            | 1.341            |
| XL       | 0.853  | 0.385              | 0.004            | 1.701            |
| XXIV     | 0.847  | 0.223              | 0.357            | 1.337            |
| XLVII    | 0.821  | 0.632              | -0.569           | 2.211            |
| XIV      | 0.679  | 0.623              | -0.692           | 2.050            |
| XXX      | 0.589  | 0.549              | -0.619           | 1.797            |
| XLIV     | 0.578  | 0.586              | -0.713           | 1.868            |

**Table S20: The variables importance in projection (VIP) in the PLS regression olfactory attribute “cherry” aroma vs volatile compounds for Pinot Noir**

| Variable | VIP(2) | Standard deviation | Lower bound(95%) | Upper bound(95%) |
|----------|--------|--------------------|------------------|------------------|
| XXVIII   | 1.966  | 0.854              | 0.087            | 3.844            |
| VI       | 1.427  | 0.295              | 0.777            | 2.077            |
| III      | 1.179  | 0.527              | 0.018            | 2.340            |
| XLII     | 1.148  | 0.562              | -0.089           | 2.385            |
| XVI      | 1.147  | 0.651              | -0.286           | 2.580            |
| VIII     | 1.131  | 0.480              | 0.075            | 2.188            |
| XXI      | 1.080  | 0.347              | 0.316            | 1.844            |
| XXX      | 1.063  | 0.482              | 0.004            | 2.123            |
| XLI      | 1.058  | 0.381              | 0.221            | 1.896            |
| XL       | 1.032  | 0.263              | 0.453            | 1.610            |
| X        | 0.918  | 0.249              | 0.370            | 1.466            |
| XLVII    | 0.735  | 1.098              | -1.681           | 3.151            |
| XXXVIII  | 0.663  | 0.226              | 0.166            | 1.161            |
| XLIII    | 0.432  | 0.597              | -0.882           | 1.745            |
| XXXIII   | 0.325  | 0.301              | -0.336           | 0.987            |
| XIV      | 0.268  | 0.552              | -0.947           | 1.484            |
| XLIV     | 0.261  | 0.639              | -1.145           | 1.666            |
| XXIV     | 0.249  | 0.598              | -1.068           | 1.565            |

**Table S21: The variables importance in projection (VIP) in the PLS regression olfactory attribute “licorice” aroma vs volatile compounds for Pinot Noir**

| Variable | VIP(2) | Standard deviation | Lower bound(95%) | Upper bound(95%) |
|----------|--------|--------------------|------------------|------------------|
| XLIII    | 1.596  | 0.365              | 0.792            | 2.399            |
| XLIV     | 1.249  | 0.942              | -0.825           | 3.323            |
| XIV      | 1.188  | 1.010              | -1.035           | 3.411            |
| XXIV     | 1.182  | 0.448              | 0.197            | 2.167            |
| XLI      | 1.154  | 0.360              | 0.363            | 1.946            |
| XVI      | 1.113  | 0.347              | 0.350            | 1.876            |
| XXI      | 1.096  | 0.507              | -0.020           | 2.211            |
| XXX      | 1.080  | 0.270              | 0.487            | 1.674            |
| XLVII    | 1.059  | 0.996              | -1.134           | 3.252            |
| XLII     | 1.037  | 0.392              | 0.175            | 1.899            |
| XL       | 0.974  | 0.380              | 0.137            | 1.811            |
| X        | 0.905  | 0.367              | 0.097            | 1.713            |
| VIII     | 0.846  | 0.481              | -0.212           | 1.903            |
| VI       | 0.815  | 0.596              | -0.497           | 2.127            |
| III      | 0.638  | 0.490              | -0.440           | 1.717            |
| XXVIII   | 0.456  | 0.439              | -0.510           | 1.422            |
| XXXVIII  | 0.307  | 0.312              | -0.379           | 0.993            |
| XXXIII   | 0.307  | 0.471              | -0.730           | 1.343            |

**Table S22: The variables importance in projection (VIP) in the PLS regression olfactory attribute “fresh wood” aroma vs volatile compounds for Pinot Noir**

| Variable | VIP(3) | Standard deviation | Lower bound(95%) | Upper bound(95%) |
|----------|--------|--------------------|------------------|------------------|
| XXVIII   | 1.817  | 0.908              | -0.181           | 3.815            |
| XXIV     | 1.295  | 0.316              | 0.599            | 1.991            |
| XLIII    | 1.213  | 0.381              | 0.375            | 2.051            |
| XIV      | 1.091  | 0.639              | -0.315           | 2.496            |
| III      | 1.051  | 0.274              | 0.448            | 1.654            |
| XLIV     | 1.036  | 0.658              | -0.413           | 2.485            |
| XLVII    | 1.005  | 0.513              | -0.124           | 2.134            |
| XXX      | 1.002  | 0.211              | 0.538            | 1.466            |
| XXXVIII  | 0.984  | 0.241              | 0.453            | 1.515            |
| XXXIII   | 0.963  | 0.295              | 0.313            | 1.614            |
| VIII     | 0.834  | 0.192              | 0.413            | 1.256            |
| XLII     | 0.811  | 0.189              | 0.394            | 1.228            |
| XL       | 0.798  | 0.312              | 0.112            | 1.484            |
| XLI      | 0.778  | 0.221              | 0.291            | 1.264            |
| XXI      | 0.717  | 0.434              | -0.240           | 1.673            |
| XVI      | 0.709  | 0.314              | 0.017            | 1.401            |
| VI       | 0.615  | 0.193              | 0.190            | 1.041            |
| X        | 0.530  | 0.144              | 0.212            | 0.848            |
